# Supplementary material for: Morphology tuning of noble metal nanoparticles by diffusion–reaction control
Source: Royal Society of Chemistry journal article supplement (doi:10.1039/c4ce00944d), 2014-01-01
Supplement: c4ce00944d1.pdf [file c4ce00944d1.pdf]

## Electronic Supplementary Information

### **Morphology tuning of noble metal nanoparticles by diffusion-reaction control**

Feng Ye,<sup>a</sup> Hui Liu,<sup>ab</sup> Wenlai Huang<sup>\*c</sup> and Jun Yang<sup>\*a</sup>

<sup>a</sup> State Key Laboratory of Multiphase Complex Systems, Institute of Process Engineering, Chinese Academy of Sciences, Beijing, China 100190. Fax: 86-10-8254 4915; Tel: 86-10-8254 4915; E-mail: [jyang@ipe.ac.cn](mailto:jyang@ipe.ac.cn)

<sup>b</sup> University of Chinese Academy of Sciences, No. 19A Yuquan Road, Beijing, China 100049

<sup>c</sup> EMMS Group, State Key Laboratory of Multiphase Complex Systems, Institute of Process Engineering, Chinese Academy of Sciences, Beijing, China 100190. Fax: 86-10-8254 8065; Tel: 86-10-8254 4942; E-mail: [wluang@ipe.ac.cn](mailto:wluang@ipe.ac.cn)

Financial supports from State Key Laboratory of Multiphase Complex Systems, Institute of Process Engineering, Chinese Academy of Sciences (MPCS-2012-A-11), the 100 Talents Program of the Chinese Academy of Sciences, and National Natural Science Foundation of China (No.: 21173226, 21376247) is gratefully acknowledged.

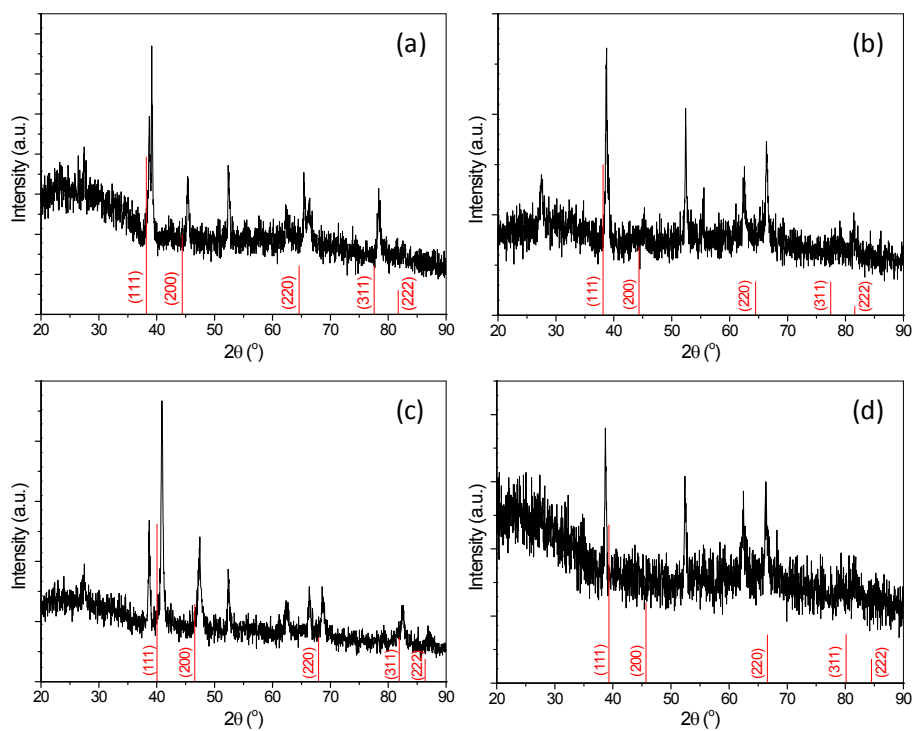

**Fig. S1** XRD patterns of face-centered cubic (fcc) Au (a), Ag (b), Pd (c), and Pt nanoparticles (d) prepared by electrochemical reduction approach with the current density of  $0.1 \text{ mA/cm}^2$  and diffusion length ( $L$ ) of 5 cm, respectively. The references are JCPDS 893697 for Au, JCPDS 893722 for Ag, JCPDS 882335 for Pd, and JCPDS 882343 for Pt, respectively.

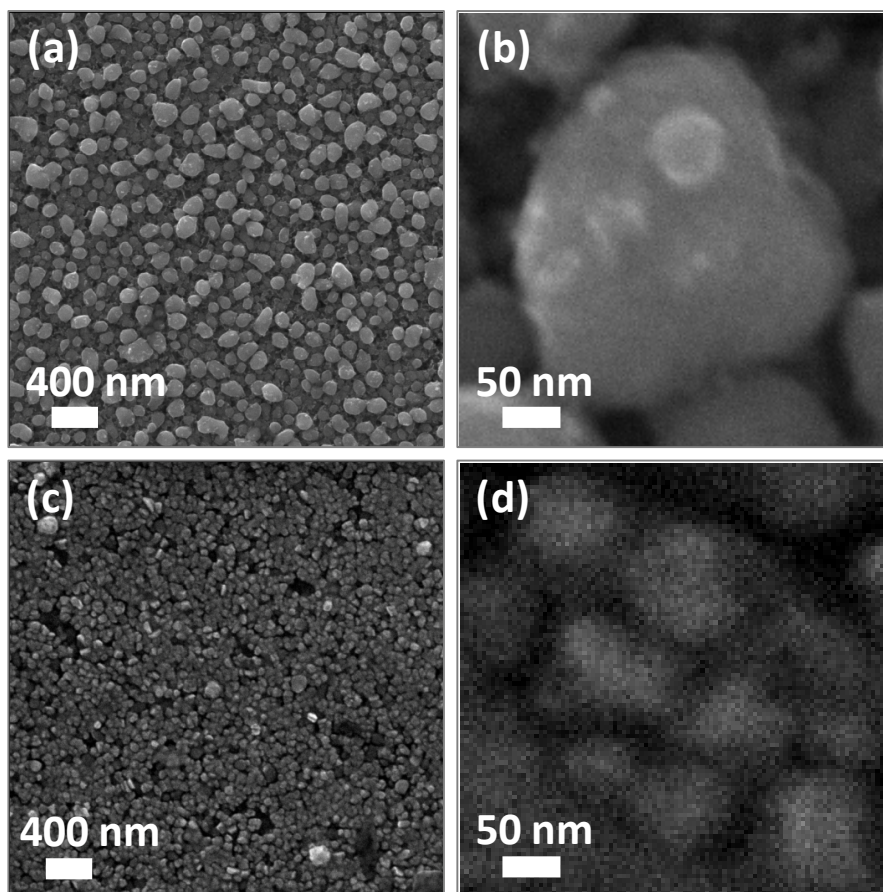

**Fig. S2** SEM images with low magnification (a,c) and high magnification (b,d) of Au nanoparticles synthesized by electrochemical reduction approach with diffusion length ( $L$ ) of 5 cm and current density of 0.33 mA/cm<sup>2</sup> (a,b) and 0.66 mA/cm<sup>2</sup> (c,d), respectively.

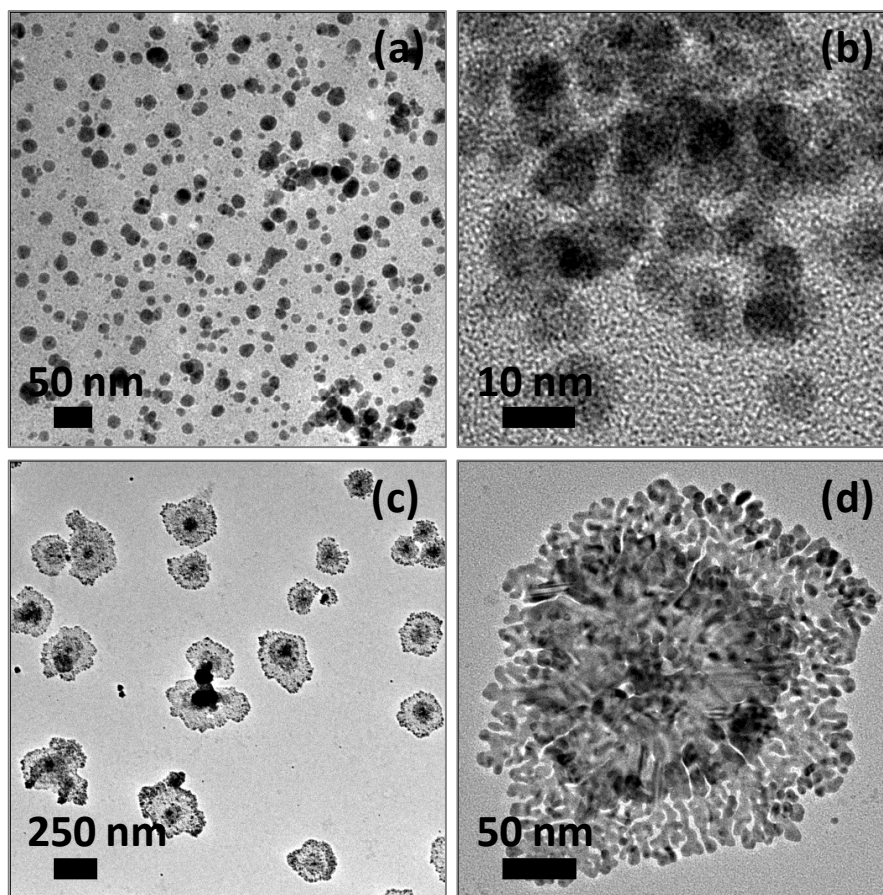

**Fig. S3** TEM images with low magnification (a,c) and high magnification (b,d) of Ag nanoparticles synthesized by photo-reduction approach with diffusion length ( $L$ ) of 15 cm (a,b) and 5 cm (c,d), respectively.

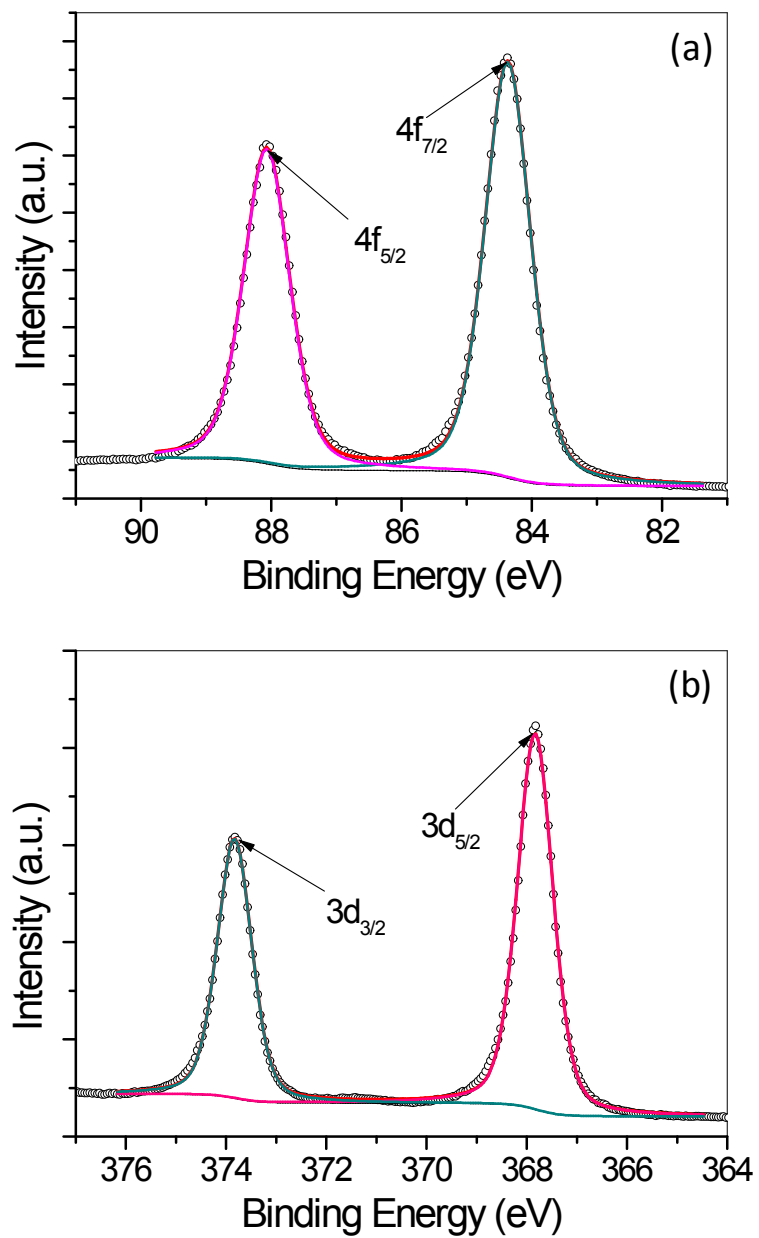

**Fig. S4** XPS spectra of Au (a) and Ag nanoparticles (b) prepared by photo-reduction approach with the diffusion length ( $L$ ) of 5 cm.
